# Supplementary material
Source: Springer Nature journal article supplement (https://www.springermedizin.de/resource/supplementary/12913_2009_1181_MOESM1_ESM.pdf/9528304)
Supplement: MOESM1 [file 9528304]

Table 2. Patient Outcomes and Acute Hospitalization Resource Utilization by Hospital

|                              | <b>Total</b><br>(N=206) | <b>Community</b><br>(N=127) | <b>University</b><br>(N=79) | <b>P</b> |
|------------------------------|-------------------------|-----------------------------|-----------------------------|----------|
| Tests Performed              |                         | <i>n, (%)</i>               |                             |          |
| CT brain                     | 206 (100)               | 127 (100)                   | 79 (100)                    | 1.000    |
| Follow up CT brain           | 152 (74)                | 93 (73)                     | 59 (75)                     | .817     |
| MRI brain                    | 49 (24)                 | 21 (17)                     | 28 (35)                     | .002     |
| MRA brain                    | 35 (17)                 | 11 (9)                      | 24 (30)                     | <.001    |
| MRA neck                     | 38 (18)                 | 20 (16)                     | 18 (23)                     | .205     |
| Carotid Doppler              | 114 (55)                | 71 (56)                     | 43 (54)                     | .836     |
| Angiography                  | 17 (8)                  | 6 (4)                       | 11 (13)                     | .020     |
| Transthoracic Echo           | 58 (28)                 | 31 (24)                     | 27 (34)                     | .130     |
| Transesophageal Echo         | 69 (33)                 | 32 (25)                     | 37 (47)                     | .001     |
| EEG                          | 15 (7)                  | 13 (10)                     | 2 (3)                       | .039     |
| Outcomes                     |                         | <i>mean ± stdev</i>         |                             |          |
| LOS – all (days)             | 6.75 ± 4.6              | 6.33 ± 4.3                  | 7.43 ± 5.0                  | .096     |
| LOS – surviving (days)       | 6.91 ± 4.7              | 6.42 ± 4.4                  | 7.65 ± 4.9                  | .084     |
| Improved from admission      | 154 (75%)               | 90 (71%)                    | 64 (81%)                    | .137     |
| Discharge destination/status |                         | <i>n, (%)</i>               |                             | .302     |
| Home                         | 79 (38)                 | 42 (33)                     | 37 (47)                     |          |
| Inpatient rehab              | 60 (29)                 | 39 (31)                     | 21 (27)                     |          |
| Other acute care hosp        | 4 (2)                   | 2 (2)                       | 2 (3)                       |          |
| Nursing home/assist living   | 34 (17)                 | 23 (18)                     | 11 (14)                     |          |
| Death                        | 29 (13)                 | 21 (17)                     | 8 (10)                      |          |

Abbreviations: CT = computed tomography; MRI = magnetic resonance imaging; MRA = magnetic resonance angiography; EEG = electroencephalogram; LOS = length of stay.
